# Supplementary material for: Catalytic methanation of CO2 in biogas: experimental results from a reactor at full scale
Source: Royal Society of Chemistry journal article supplement (doi:10.1039/c9re00351g), 2019-11-28
Supplement: c9re00351g1.pdf [file c9re00351g1.pdf]

## ARTICLE

Received 00th January 20xx,  
Accepted 00th January 20xx

DOI: 10.1039/x0xx00000x

### Supplementary material

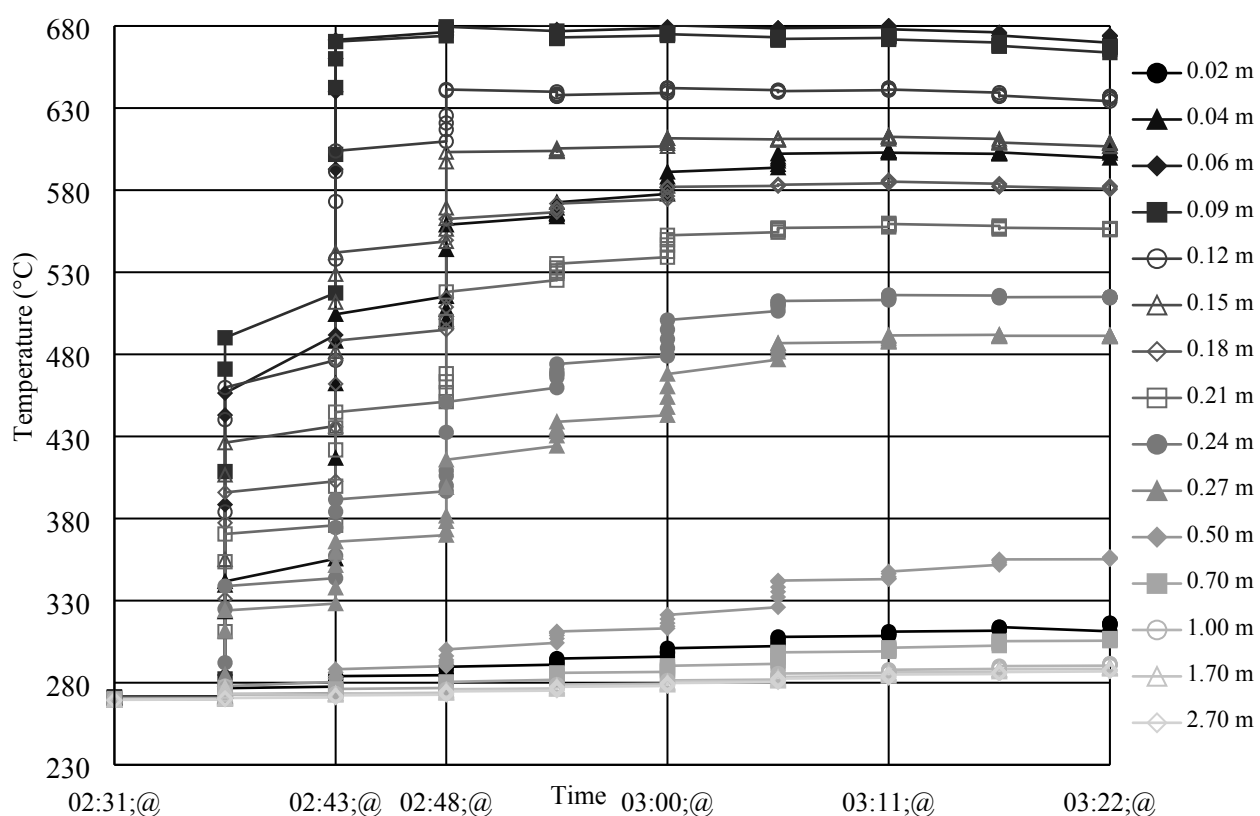

Figure SI 1 Temperature development during startup of the reactor. The series represent the temperature probes down through the first reactor tube. Processing of 9.70 Nm<sup>3</sup>/h biogas and 15.9 Nm<sup>3</sup>/h H<sub>2</sub> at 20 barg with a H<sub>2</sub>/CO<sub>2</sub> ratio of 4.1.

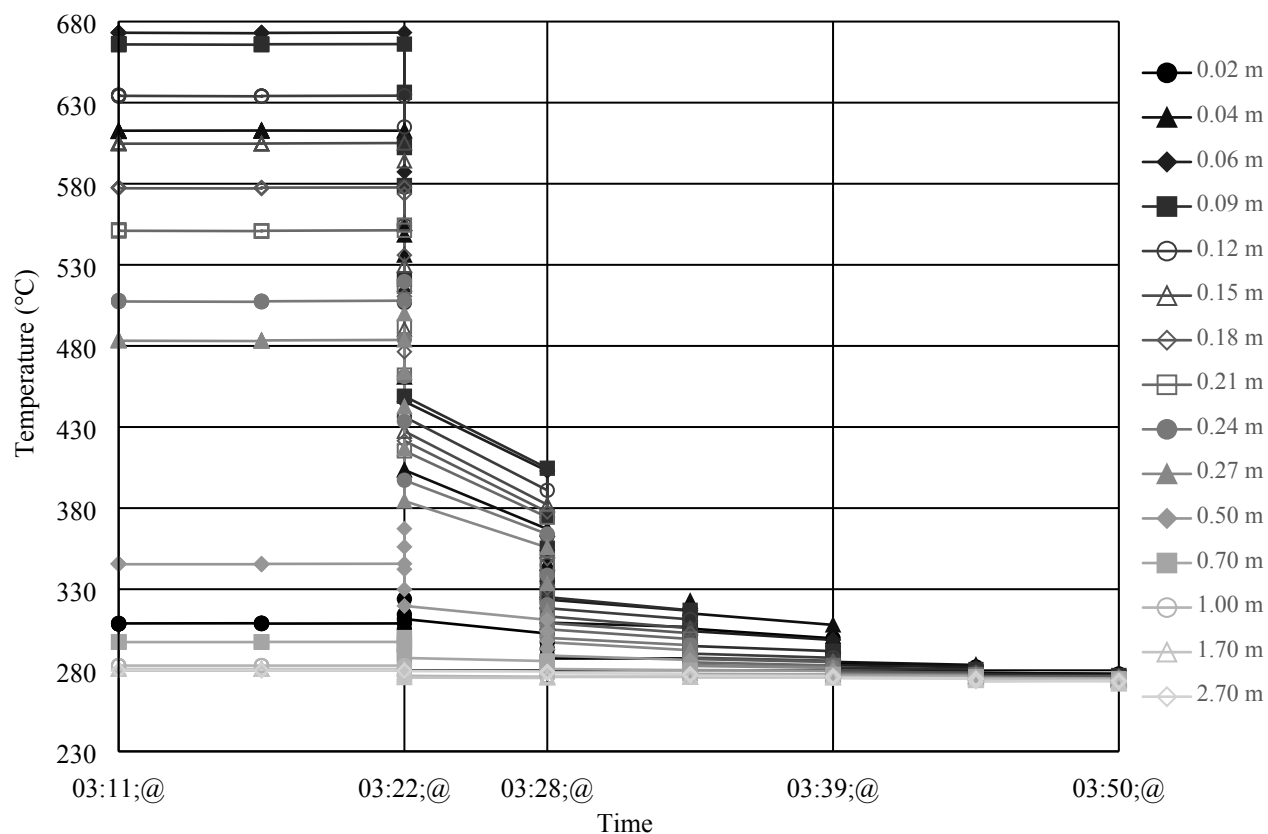

Figure SI 2 Temperature development during shutdown of the reactor. The series represent the temperature probes down through the first reactor tube. Processing of 9.70 Nm<sup>3</sup>/h biogas and 15.9 Nm<sup>3</sup>/h H<sub>2</sub> at 20 barg with a H<sub>2</sub>/CO<sub>2</sub> ratio of 4.1.
